# Supplementary material for: Effect of Capsaicin Stress on Aroma-Producing Properties of Lactobacillus plantarum CL-01 Based on E-Nose and GC–IMS
Source: MDPI journal article supplement (doi:10.3390/molecules29010107), 2023-12-23
Supplement: s1 [file s1]

# Effect of Capsaicin Stress on Aroma-Producing Properties of *Lactobacillus plantarum* CL-01 Based on E-Nose and GC-IMS

Qian Zhang <sup>1</sup>, Junni Tang <sup>1</sup>, Jing Deng <sup>2</sup>, Zijian Cai <sup>1</sup>, Xiaole Jiang <sup>3</sup> and Chenglin Zhu <sup>1,\*</sup>

<sup>1</sup> College of Food Science and Technology, Southwest Minzu University, Chengdu 610041, China; zhangqian1121@outlook.com (Q.Z.); junneytang@swun.edu.cn (J.T.); caizijian@swun.edu.cn (Z.C.)

<sup>2</sup> Cuisine Science Key Laboratory of Sichuan Province, Sichuan Tourism University, Chengdu 610100, China; dj3930590@sina.com

<sup>3</sup> College of Chemistry and Environment, Southwest Minzu University, Chengdu 610041, China; jiangxl@swun.edu.cn

\* Correspondence: chenglin.zhu@swun.edu.cn; Tel.: +86-028-85928478

## Supporting Information

**Table S1.** Response values (mean  $\pm$  sd) of the E-nose to *L. plantarum* fermentation for 24 h under different capsaicin concentrations.

| Sensors  | A                                              | B                                              | C                                              | D                                              |
|----------|------------------------------------------------|------------------------------------------------|------------------------------------------------|------------------------------------------------|
| LY2/LG   | $2.83 \times 10^{-2} \pm 2.90 \times 10^{-2}$  | $1.17 \times 10^{-2} \pm 1.61 \times 10^{-3}$  | $1.27 \times 10^{-2} \pm 3.72 \times 10^{-3}$  | $1.15 \times 10^{-2} \pm 2.98 \times 10^{-3}$  |
| LY2/G    | $-2.95 \times 10^{-2} \pm 2.43 \times 10^{-2}$ | $-1.78 \times 10^{-2} \pm 2.70 \times 10^{-3}$ | $-1.86 \times 10^{-2} \pm 4.27 \times 10^{-3}$ | $-1.72 \times 10^{-2} \pm 3.19 \times 10^{-3}$ |
| LY2/AA   | $-8.76 \times 10^{-3} \pm 9.30 \times 10^{-3}$ | $-4.03 \times 10^{-3} \pm 5.11 \times 10^{-4}$ | $-4.57 \times 10^{-3} \pm 1.30 \times 10^{-3}$ | $-4.10 \times 10^{-3} \pm 8.97 \times 10^{-4}$ |
| LY2/Gh   | $-1.57 \times 10^{-2} \pm 1.18 \times 10^{-2}$ | $-1.05 \times 10^{-2} \pm 1.93 \times 10^{-3}$ | $-1.08 \times 10^{-2} \pm 2.52 \times 10^{-3}$ | $-9.85 \times 10^{-3} \pm 1.81 \times 10^{-3}$ |
| LY2/gCTI | $-1.93 \times 10^{-2} \pm 1.29 \times 10^{-2}$ | $-1.45 \times 10^{-2} \pm 2.13 \times 10^{-3}$ | $-1.56 \times 10^{-2} \pm 3.85 \times 10^{-3}$ | $-1.41 \times 10^{-2} \pm 2.72 \times 10^{-3}$ |
| LY2/gCT  | $-1.08 \times 10^{-2} \pm 5.72 \times 10^{-3}$ | $-1.04 \times 10^{-2} \pm 9.06 \times 10^{-4}$ | $-1.30 \times 10^{-2} \pm 4.09 \times 10^{-3}$ | $-1.13 \times 10^{-2} \pm 3.05 \times 10^{-3}$ |
| T30/1    | $9.82 \times 10^{-2} \pm 3.43 \times 10^{-3}$  | $9.41 \times 10^{-2} \pm 5.46 \times 10^{-4}$  | $9.40 \times 10^{-2} \pm 3.40 \times 10^{-4}$  | $9.44 \times 10^{-2} \pm 6.19 \times 10^{-4}$  |
| P10/1    | $9.30 \times 10^{-2} \pm 1.91 \times 10^{-3}$  | $9.27 \times 10^{-2} \pm 2.21 \times 10^{-4}$  | $9.25 \times 10^{-2} \pm 1.54 \times 10^{-4}$  | $9.28 \times 10^{-2} \pm 4.13 \times 10^{-4}$  |
| P10/2    | $8.56 \times 10^{-2} \pm 1.63 \times 10^{-3}$  | $8.47 \times 10^{-2} \pm 1.37 \times 10^{-3}$  | $8.59 \times 10^{-2} \pm 1.52 \times 10^{-3}$  | $8.56 \times 10^{-2} \pm 7.24 \times 10^{-4}$  |
| P40/1    | $8.67 \times 10^{-2} \pm 1.68 \times 10^{-3}$  | $8.80 \times 10^{-2} \pm 7.78 \times 10^{-4}$  | $8.84 \times 10^{-2} \pm 1.31 \times 10^{-3}$  | $8.79 \times 10^{-2} \pm 1.11 \times 10^{-3}$  |
| T70/2    | $9.60 \times 10^{-2} \pm 3.97 \times 10^{-3}$  | $9.17 \times 10^{-2} \pm 3.82 \times 10^{-4}$  | $9.19 \times 10^{-2} \pm 1.54 \times 10^{-5}$  | $9.19 \times 10^{-2} \pm 8.26 \times 10^{-5}$  |
| PA/2     | $1.01 \times 10^{-1} \pm 2.84 \times 10^{-3}$  | $9.78 \times 10^{-2} \pm 7.86 \times 10^{-4}$  | $9.74 \times 10^{-2} \pm 1.18 \times 10^{-3}$  | $9.83 \times 10^{-2} \pm 1.35 \times 10^{-3}$  |
| P30/1    | $1.03 \times 10^{-1} \pm 2.94 \times 10^{-3}$  | $9.86 \times 10^{-2} \pm 1.60 \times 10^{-3}$  | $9.80 \times 10^{-2} \pm 2.05 \times 10^{-3}$  | $9.92 \times 10^{-2} \pm 2.45 \times 10^{-3}$  |
| P40/2    | $9.03 \times 10^{-2} \pm 5.21 \times 10^{-3}$  | $8.62 \times 10^{-2} \pm 1.40 \times 10^{-4}$  | $8.68 \times 10^{-2} \pm 1.05 \times 10^{-3}$  | $8.61 \times 10^{-2} \pm 7.08 \times 10^{-4}$  |
| P30/2    | $1.01 \times 10^{-1} \pm 4.03 \times 10^{-3}$  | $9.57 \times 10^{-2} \pm 1.00 \times 10^{-3}$  | $9.51 \times 10^{-2} \pm 1.17 \times 10^{-3}$  | $9.56 \times 10^{-2} \pm 1.42 \times 10^{-3}$  |
| T40/2    | $6.93 \times 10^{-2} \pm 5.10 \times 10^{-3}$  | $7.00 \times 10^{-2} \pm 1.96 \times 10^{-3}$  | $7.12 \times 10^{-2} \pm 3.56 \times 10^{-3}$  | $6.94 \times 10^{-2} \pm 2.90 \times 10^{-3}$  |
| T40/1    | $7.05 \times 10^{-2} \pm 3.18 \times 10^{-3}$  | $7.70 \times 10^{-2} \pm 3.16 \times 10^{-3}$  | $7.75 \times 10^{-2} \pm 3.59 \times 10^{-3}$  | $7.56 \times 10^{-2} \pm 3.48 \times 10^{-3}$  |
| TA/2     | $6.07 \times 10^{-2} \pm 3.44 \times 10^{-3}$  | $6.92 \times 10^{-2} \pm 4.59 \times 10^{-3}$  | $7.12 \times 10^{-2} \pm 6.16 \times 10^{-3}$  | $6.82 \times 10^{-2} \pm 6.10 \times 10^{-3}$  |

**Table S2.** Response values (mean  $\pm$  sd) of the E-nose to *L. plantarum* along fermentation under capsaicin stress

| Sensors  | BT00                                           | BT06                                           | BT12                                           | BT18                                           | BT24                                           |
|----------|------------------------------------------------|------------------------------------------------|------------------------------------------------|------------------------------------------------|------------------------------------------------|
| LY2/LG   | $6.64 \times 10^{-3} \pm 5.45 \times 10^{-4}$  | $1.14 \times 10^{-2} \pm 6.91 \times 10^{-3}$  | $1.85 \times 10^{-2} \pm 1.58 \times 10^{-2}$  | $1.19 \times 10^{-2} \pm 3.88 \times 10^{-4}$  | $2.14 \times 10^{-2} \pm 8.89 \times 10^{-4}$  |
| LY2/G    | $-1.18 \times 10^{-2} \pm 3.86 \times 10^{-4}$ | $-2.05 \times 10^{-2} \pm 1.18 \times 10^{-2}$ | $-2.88 \times 10^{-2} \pm 2.22 \times 10^{-2}$ | $-1.67 \times 10^{-2} \pm 3.98 \times 10^{-4}$ | $-3.02 \times 10^{-2} \pm 6.01 \times 10^{-4}$ |
| LY2/AA   | $-2.35 \times 10^{-3} \pm 2.06 \times 10^{-4}$ | $-4.45 \times 10^{-3} \pm 2.57 \times 10^{-3}$ | $-7.36 \times 10^{-3} \pm 5.89 \times 10^{-3}$ | $-4.14 \times 10^{-3} \pm 7.01 \times 10^{-4}$ | $-5.04 \times 10^{-3} \pm 5.15 \times 10^{-4}$ |
| LY2/Gh   | $-8.53 \times 10^{-3} \pm 2.62 \times 10^{-4}$ | $-1.51 \times 10^{-2} \pm 1.04 \times 10^{-2}$ | $-2.15 \times 10^{-2} \pm 2.00 \times 10^{-2}$ | $-1.25 \times 10^{-2} \pm 3.73 \times 10^{-4}$ | $-1.76 \times 10^{-2} \pm 3.40 \times 10^{-4}$ |
| LY2/gCTI | $-1.22 \times 10^{-2} \pm 6.50 \times 10^{-4}$ | $-1.76 \times 10^{-2} \pm 8.55 \times 10^{-3}$ | $-2.42 \times 10^{-2} \pm 1.75 \times 10^{-2}$ | $-1.50 \times 10^{-2} \pm 2.40 \times 10^{-3}$ | $-2.24 \times 10^{-2} \pm 2.20 \times 10^{-4}$ |
| LY2/gCT  | $-8.99 \times 10^{-3} \pm 5.29 \times 10^{-4}$ | $-1.39 \times 10^{-2} \pm 8.39 \times 10^{-3}$ | $-2.26 \times 10^{-2} \pm 2.09 \times 10^{-2}$ | $-1.17 \times 10^{-2} \pm 1.03 \times 10^{-3}$ | $-1.24 \times 10^{-2} \pm 1.32 \times 10^{-3}$ |
| T30/1    | $9.58 \times 10^{-2} \pm 2.07 \times 10^{-3}$  | $1.45 \times 10^{-1} \pm 8.59 \times 10^{-2}$  | $1.80 \times 10^{-1} \pm 1.49 \times 10^{-1}$  | $9.39 \times 10^{-2} \pm 1.82 \times 10^{-4}$  | $9.40 \times 10^{-2} \pm 4.14 \times 10^{-4}$  |
| P10/1    | $9.28 \times 10^{-2} \pm 2.41 \times 10^{-3}$  | $1.09 \times 10^{-1} \pm 3.12 \times 10^{-2}$  | $1.17 \times 10^{-1} \pm 4.24 \times 10^{-2}$  | $9.25 \times 10^{-2} \pm 3.75 \times 10^{-4}$  | $9.97 \times 10^{-2} \pm 1.13 \times 10^{-3}$  |
| P10/2    | $8.67 \times 10^{-2} \pm 2.64 \times 10^{-3}$  | $9.85 \times 10^{-2} \pm 2.47 \times 10^{-2}$  | $8.34 \times 10^{-2} \pm 2.84 \times 10^{-3}$  | $8.57 \times 10^{-2} \pm 3.45 \times 10^{-4}$  | $8.46 \times 10^{-2} \pm 1.28 \times 10^{-3}$  |
| P40/1    | $8.64 \times 10^{-2} \pm 3.73 \times 10^{-3}$  | $1.03 \times 10^{-1} \pm 2.67 \times 10^{-2}$  | $1.18 \times 10^{-1} \pm 5.13 \times 10^{-2}$  | $8.84 \times 10^{-2} \pm 2.29 \times 10^{-4}$  | $9.91 \times 10^{-2} \pm 1.47 \times 10^{-3}$  |
| T70/2    | $8.64 \times 10^{-2} \pm 4.86 \times 10^{-3}$  | $9.44 \times 10^{-2} \pm 3.92 \times 10^{-3}$  | $9.64 \times 10^{-2} \pm 8.47 \times 10^{-3}$  | $9.18 \times 10^{-2} \pm 3.83 \times 10^{-4}$  | $9.50 \times 10^{-2} \pm 6.11 \times 10^{-3}$  |
| PA/2     | $9.88 \times 10^{-2} \pm 6.92 \times 10^{-4}$  | $1.11 \times 10^{-1} \pm 2.00 \times 10^{-2}$  | $1.09 \times 10^{-1} \pm 1.96 \times 10^{-2}$  | $9.74 \times 10^{-2} \pm 3.16 \times 10^{-4}$  | $9.77 \times 10^{-2} \pm 7.16 \times 10^{-4}$  |
| P30/1    | $9.74 \times 10^{-2} \pm 3.51 \times 10^{-3}$  | $7.02 \times 10^{-2} \pm 5.32 \times 10^{-2}$  | $6.67 \times 10^{-2} \pm 5.55 \times 10^{-2}$  | $9.77 \times 10^{-2} \pm 5.71 \times 10^{-4}$  | $9.85 \times 10^{-2} \pm 1.50 \times 10^{-3}$  |
| P40/2    | $8.70 \times 10^{-2} \pm 1.14 \times 10^{-3}$  | $6.14 \times 10^{-2} \pm 4.29 \times 10^{-2}$  | $5.94 \times 10^{-2} \pm 4.54 \times 10^{-2}$  | $8.60 \times 10^{-2} \pm 4.15 \times 10^{-4}$  | $8.61 \times 10^{-2} \pm 6.69 \times 10^{-5}$  |
| P30/2    | $9.52 \times 10^{-2} \pm 2.05 \times 10^{-3}$  | $8.02 \times 10^{-2} \pm 2.93 \times 10^{-2}$  | $7.67 \times 10^{-2} \pm 3.28 \times 10^{-2}$  | $9.51 \times 10^{-2} \pm 3.59 \times 10^{-4}$  | $9.56 \times 10^{-2} \pm 8.96 \times 10^{-4}$  |
| T40/2    | $6.99 \times 10^{-2} \pm 2.77 \times 10^{-3}$  | $5.38 \times 10^{-2} \pm 2.48 \times 10^{-2}$  | $5.44 \times 10^{-2} \pm 2.61 \times 10^{-2}$  | $7.05 \times 10^{-2} \pm 1.22 \times 10^{-3}$  | $6.99 \times 10^{-2} \pm 2.05 \times 10^{-3}$  |
| T40/1    | $7.58 \times 10^{-2} \pm 3.79 \times 10^{-3}$  | $6.84 \times 10^{-2} \pm 1.01 \times 10^{-2}$  | $5.91 \times 10^{-2} \pm 3.09 \times 10^{-2}$  | $7.78 \times 10^{-2} \pm 1.42 \times 10^{-3}$  | $7.69 \times 10^{-2} \pm 3.28 \times 10^{-3}$  |
| TA/2     | $6.49 \times 10^{-2} \pm 1.67 \times 10^{-3}$  | $6.59 \times 10^{-2} \pm 4.59 \times 10^{-3}$  | $6.52 \times 10^{-2} \pm 6.89 \times 10^{-3}$  | $7.13 \times 10^{-2} \pm 1.33 \times 10^{-3}$  | $6.92 \times 10^{-2} \pm 4.67 \times 10^{-3}$  |
